# Supplementary material
Source: MDPI journal article supplement (https://www.mdpi.com/2571-6255/3/4/55)
Supplement: s1 [file s1]

Archive with 3 entries (3 files):
- Sup_fig_1_TTWx.png
- Sup_fig_2NJWx.png
- Sup_fig_captions_riv1.pdf
