# Supplementary material
Source: MDPI journal article supplement (https://www.mdpi.com/2571-6255/3/4/55)

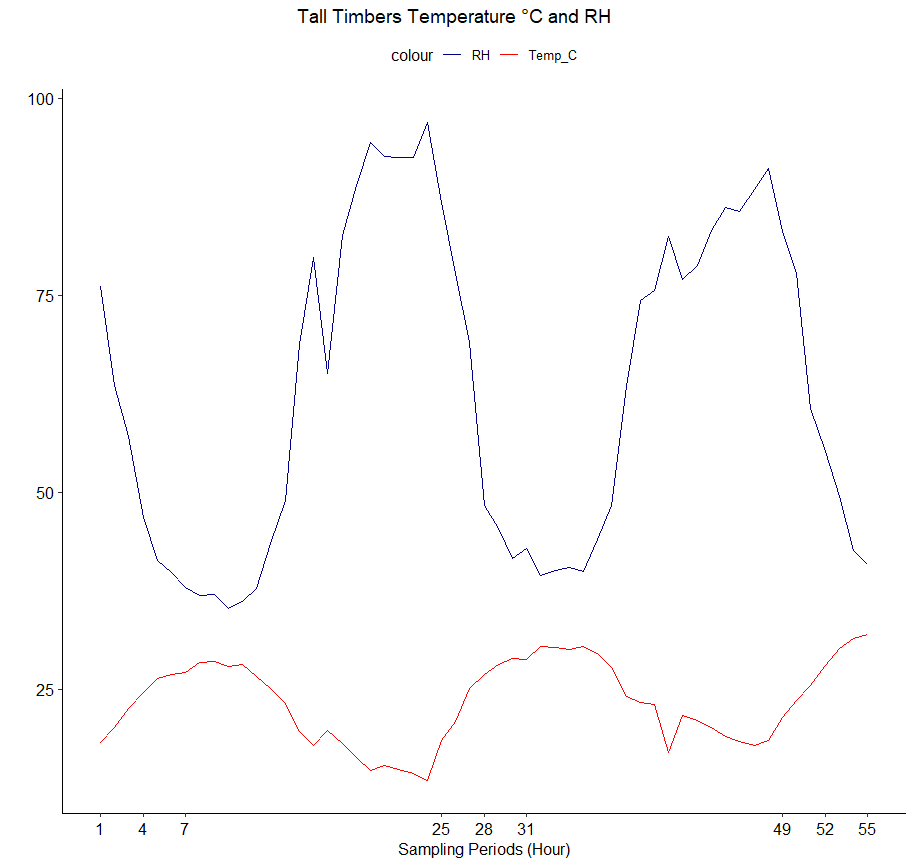

Supplement: s1 [file s1 › Sup_fig_1_TTWx.png]

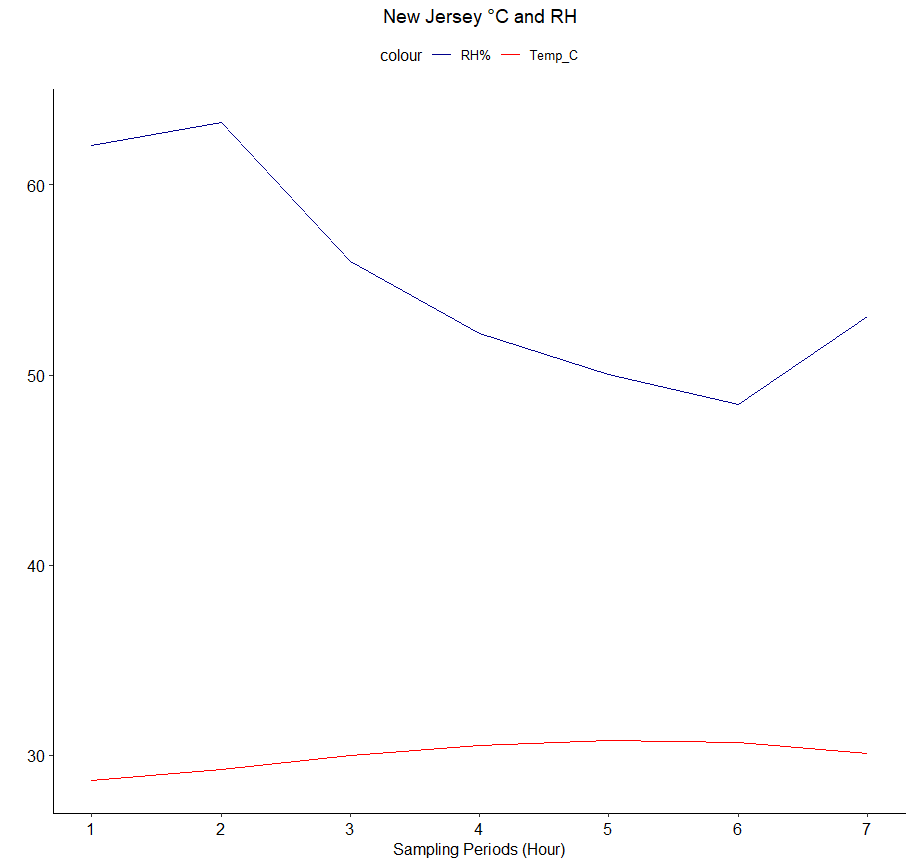

Supplement: s1 [file s1 › Sup_fig_2NJWx.png]
